# Supplementary material for: Prevalence of ‘pouch failure’ of the ileoanal pouch in ulcerative colitis: a systematic review and meta-analysis
Source: Int J Colorectal Dis. 2021 Nov 26;37(2):357–64. doi: 10.1007/s00384-021-04067-6 (PMC8803821; doi:10.1007/s00384-021-04067-6)
Supplement: Supplementary file 2 — Supplementary file2 (XLSX 16 KB) [file 384_2021_4067_MOESM2_ESM.xlsx]

## Sheet: Pouch failure extraction
							FAILURE															Reason for failure
						12 months		36 months		60 month		120 months		240 months		>240 months
Title	Author	Abstract or full text	Year	Type of study	Total cohort	numerator	denominator	numerator	denominator	numerator	denominator	numerator	denominator	numerator	denominator	numerator	denominator	Overal pouch failure from total cohort	mean/median follow up	Median follow-up	Mean follow-up	Pouchitis	Crohn's disease	Stricture	Surgical complication	pelvic sepsis	Fistula
Stoma-less ileal-pouch-anal-anastomosis is not associated with increased long-term pouch failure rates in patients with ulcerative colitis.	Olecki et al	Abstract only	2021	Prospective cohort	414	-	-	-	-	-	-	-	-	-	-	-	-	26	9	-	8.5years / 8.1years	-	-	-	-	-	-
Time Trend Analysis of Pre-Operative Characteristics and Post-Operative Pouch Outcomes in UC Patients Undergoing Ileal Pouch Anal-Anastomosis	Erondu et al	Abstract only	2020	Prospective cohort	322	-	-	-	-	-	-	-	-	-	-	-	-	32	9	8.9 years	-	-	-	-	-	-	-
Impact of preoperative duration of ulcerative colitis on long-term outcomes of restorative proctocolectomy.	Lavryk et al	Full text	2019	Prospective cohort	2797	-	-	-	-	23	761	21	538	39	653	51	845	134	17	4.2 / 6 / 13.1 / 17years	-	-	-	-	-	-	-
Comparable perioperative outcomes, long-term outcomes, and quality of life in a retrospective analysis of ulcerative colitis patients following 2-stage versus 3-stage proctocolectomy with ileal pouch-anal anastomosis	Lee et al	Full text	2019	Retrospective cohort	212	-	-	-	-	-	-	-	-	-	-	-	-	10	5	-	4.7 years	-	-	-	-	-	-
Long-Term Outcomes in Indeterminate Colitis Patients Undergoing Ileal Pouch-Anal Anastomosis: Function, Quality of Life, and Complications	Jackson et al	Full text	2017	Retrospective cohort	224	-	-	-	-	-	-	-	-	-	-	-	-	11	9	-	115 months	-	-	-	-	-	-
J-pouch outcomes in ulcerative colitis are not affected by preoperative administration of biologic agents	Skowron et al	Abstract only	2012	Prospective cohort	432	-	-	-	-	-	-	-	-	-	-	-	-	23	4	-	24mo / 43mo	-	-	-	-	-	-
Prevalence of primary sclerosing cholangitis in ulcerative colitis patients undergoing proctocolectomy and ileal pouch-anal anastomosis	Lepisto et al	Full text	2008	Retrospective cohort	441	-	-	-	-	-	-	-	-	-	-	-	-	15	9	9 years	-	-	-	-	-	-	-
Pouch failures following ileal pouch-anal anastomosis for ulcerative colitis	Mark-Christensen et al	Full text	2018	Retrospective cohort	1991	-	-	-	-			-	-	-	-	-	-	295	11	11.4 years	-	-	-	-	-	-	-
Restorative surgery following an UC-colectomy is more common in patients with a high income: A nationwide cohort study.	Nordenvall et al	full text	2021	retrospective cohort	1540	-	-											223	10	10.2	11.3	-	-	-	-	-	-
Pouch functional outcomes after restorative proctocolectomy with ileal-pouch reconstruction in patients with ulcerative colitis: Japanese multi-center nationwide cohort study	Uchino et al	Full text	2018	Retrospective cohort	2349	-	-	-	-	-	-	-	-	-	-	-	-	61	7	6.7		8	-	4	-	-	34
Pouch failures following restorative proctocolectomy in ulcerative colitis	Helavirta et al	full text	2020	retrospective cohort	491	-	-	-	-	27	491	41	491	51	491	53	491	53	11	11	n/a	11	7	12	-	-	12
Survival of ileal pouch anal anastomosis constructed after colectomy or secondary to a previous ileorectal anastomosis in ulcerative colitis patients: a population-based cohort study	Landerholm et al	Full text	2017	Retrospective cohort	1720	-	-	-	-	69	1720	103	1720	138	1720	-	-	103	13	12.6	-	-	-	-	-	-	-
Restorative Proctocolectomy for Ulcerative Colitis in 1985-2009.	Helavirta et al	full text	2016	retrospective cohort	352	-	-	-	-	-	-	-	-	-	-	-	-	43	5	5 years	-	1	-	-	-	-	-
Comparison of long-term outcomes of S and J pouches and continent ileostomies in ulcerative colitis patients with restorative proctocolectomy-experience in subspecialty pouch center	Mukewar et al	Full text	2014	Retrospective cohort	260	-	-	-	-	-	-	-	-	-	-	-	-	20	15	15 / 9 years	-	1	11	-	6	-	-
The experience of restorative proctocolectomy for ulcerative colitis during 1985 2009	Niuminen et al	Abstract only	2013	Retrospective cohort	352	-	-	-	-	-	-	-	-	-	-	-	-	42	5	5 years	-	-	4	-	-	-	-
The final diagnosis in pouch patients for presumed ulcerative colitis may change to Crohn's disease: patients should be warned of the consequences.	Keighley et al	abstract	2000	retrospective cohort	202	-	-	-	-	-	-	-	-	-	-	-	-	22	8	7.6	n/a	-	-	-	-	-	-
Equivalent function, quality of life and pouch survival rates after ileal pouch-anal anastomosis for indeterminate and ulcerative colitis.	Delaney et al	full text	2002	retrospective cohort	1399	-	-	-	-	-	-	-	-	-	-	-	-	49	6	n/a	5.5 +/- 3.4	-	-	-	-	-	-
Similar functional results and complications after ileal pouch-anal anastomosis in patients with indeterminate vs ulcerative colitis	Dayton et al	Full text	2002	Retrospective cohort	565	-	-	-	-	-	-	-	-	-	-	-	-	12	6	-	78.5 months	-	7	-	-	-	5
The ileo-anal pouch procedure: Complications, quality of life, and long-term results	Heushcen et al	Full text	2001	Retrospective cohort	493	-	-	-	-	-	-	-	-	-	-	-	-	16	6	6.4 years	-	-	-	-	-	-	-
Ileal pouch anal anastomosis: analysis of outcome and quality of life in 3707 patients	Fazio et al	Full text	2013	Prospective cohort	2953	-	-	-	-	-	-	-	-	-	-	-	-	151	7	84 months	-	-	-	-	-	-	-
Long-term outcome after ileal pouch-anal anastomosis: function and health-related quality of life	Berndtsson et al	Full text	2007	Retrospective cohort	399	-	-	-	-	-	-	-	-	-	-	-	-	39	15	15 years	-	-	-	-	-	-	-
Incidence and outcome of complications following restorative proctocolectomy	Arai et al	Full text	2005	Retrospective cohort	296	-	-	-	-	-	-	-	-	-	-	-	-	16	4	-	4.38 +/- 3.45 years	-	-	-	-	1	1
Functional outcomes after ileal pouch-anal anastomosis for chronic ulcerative colitis	Farouk et al	Full text	2000	Retrospective cohort	1386	-	-	-	-	-	-	-	-	-	-	-	-	92	8	8 years	-	12	16	4	-	-	20
Ileal pouch-anal anastomoses complications and function in 1005 patients.	Fazio et al	full text	1995	retrospective cohort	858	-	-	-	-	-	-	-	-	-	-	-	-	22	2	2.3		-	-	-	-	-	-
Ileal pouch-anal anastomosis for chronic ulcerative colitis. Long-term results.	Pemberton et al	full text	1987	retrospective cohort	390	18	389	24	389	-	-	-	-	-	-	-	-	24	2	n/a	2.3(0.5-5)	-	0	0	0	0	0
Risk factors for pelvic pouch failure	MacRae et al	full text	1997	retrospective cohort	551	-	-	-	-	-	-	-	-	-	-	-	-	58	3	-		-	-	-	-	-	-
